# Supplementary material for: The impact of spatial correlation on the statistical properties of the capacity of nakagami-m channels with MRC and EGC
Source: Springer Nature journal article supplement (doi:10.1186/1687-1499-2011-116), 2011-09-30

Normalized LCR,  $N_C(r)/f_{\max}$

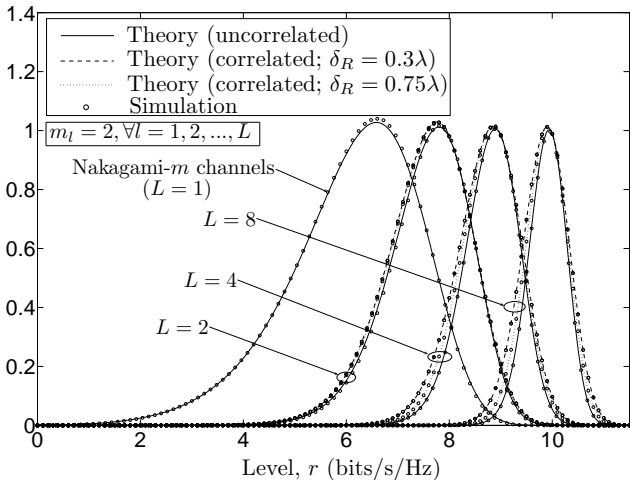

Supplement: 13638_2011_116_MOESM8_ESM.pdf [file 13638_2011_116_MOESM8_ESM.pdf]
